# Supplementary material
Source: ML conference proceedings conference paper supplement (https://openreview.net/forum?id=Yx2HjWZcZI)
Supplement: supplementary_material [file attachment]

# GSNB: Gaussian Splatting With Neural Basis Extension

## Supplementary Material

Anonymous Author(s)

### A MORE ABLATION STUDIES

#### A.1 Ablation Study On Baking Image

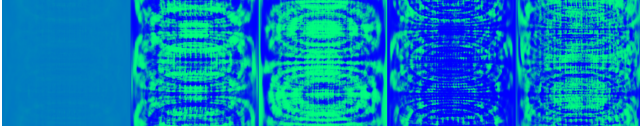

Figure 1: Visualization of the baking image in the CD scene from the Shiny [7] dataset. For the sake of brevity, we show only the first 5 channels of the image, which should have 16 channels in our implementation.

As shown in Figure 1, We visualize one of the bakery images used in our real-time rendering pipeline and the image shows rich high frequency information. We also perform an ablation study on the baking image size to determine the appropriate size for perserving the Neural Basis Extension network result. The experiment is conducted on 8 scenes from the Spaces [2] dataset, we compare the PSNR score for the different resolution images and find out that although the performance is improved with the resolution increase, the improvement is limited compared to the disk space inflation. We choose to use  $400 \times 400$  as the proper size of the baking in most of the test scene, while for a few scenes we use  $800 \times 800$ . This experiment is performed on the pruned model described in the main body.

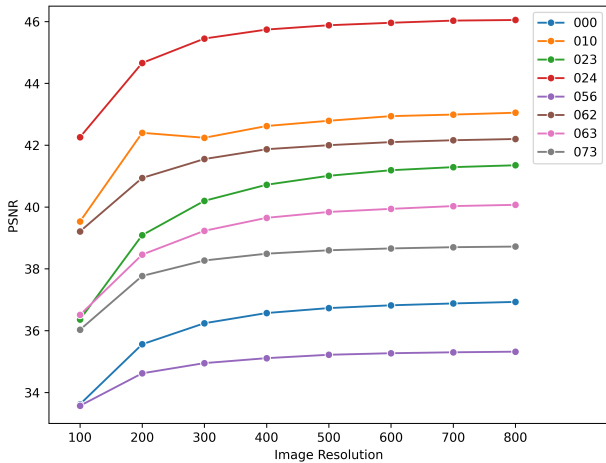

Figure 2: Effect of baking resolution on performance in 8 scenes from the Spaces [2] dataset

Table 1: Pruning strategy influence on PSNR performance

| Method   Scene | Mic   | Chair | Ship  | Materials | Lego  | Drums | Ficus | Hotdog | Avg.  |
|----------------|-------|-------|-------|-----------|-------|-------|-------|--------|-------|
| w/o pruning    | 36.90 | 35.68 | 31.81 | 30.65     | 36.40 | 26.68 | 35.66 | 38.08  | 33.98 |
| SP             | 37.04 | 36.09 | 31.56 | 30.35     | 36.50 | 26.59 | 35.61 | 38.13  | 33.98 |
| HFP            | 36.47 | 35.54 | 31.35 | 29.79     | 35.94 | 26.44 | 35.16 | 37.81  | 33.56 |
| SFP            | 37.12 | 36.04 | 31.87 | 30.68     | 36.75 | 26.63 | 35.62 | 38.28  | 34.12 |

Table 2: Pruning strategy influence on SSIM performance

| Method   Scene | Mic   | Chair | Ship  | Materials | Lego  | Drums | Ficus | Hotdog | Avg.  |
|----------------|-------|-------|-------|-----------|-------|-------|-------|--------|-------|
| w/o pruning    | 0.993 | 0.988 | 0.907 | 0.961     | 0.983 | 0.955 | 0.987 | 0.985  | 0.970 |
| SP             | 0.993 | 0.988 | 0.905 | 0.959     | 0.982 | 0.953 | 0.987 | 0.985  | 0.969 |
| HFP            | 0.992 | 0.988 | 0.906 | 0.957     | 0.982 | 0.954 | 0.986 | 0.985  | 0.969 |
| SFP            | 0.993 | 0.988 | 0.907 | 0.961     | 0.983 | 0.954 | 0.987 | 0.986  | 0.970 |

Table 3: Pruning strategy influence on LPIPS performance

| Method   Scene | Mic   | Chair | Ship  | Materials | Lego  | Drums | Ficus | Hotdog | Avg.  |
|----------------|-------|-------|-------|-----------|-------|-------|-------|--------|-------|
| w/o pruning    | 0.006 | 0.010 | 0.108 | 0.037     | 0.016 | 0.035 | 0.012 | 0.020  | 0.030 |
| SP             | 0.006 | 0.010 | 0.113 | 0.039     | 0.018 | 0.037 | 0.012 | 0.021  | 0.032 |
| HFP            | 0.007 | 0.011 | 0.112 | 0.042     | 0.018 | 0.038 | 0.013 | 0.022  | 0.033 |
| SFP            | 0.006 | 0.010 | 0.109 | 0.037     | 0.016 | 0.036 | 0.012 | 0.020  | 0.031 |

#### A.2 Ablation Study On Pruning Strategy

To decide the best pruning strategy to apply to the trained GSNB, we test three different pruning strategies. The first strategy, we call Single Pruning (SP), filters out the less important 3D Gaussians at the beginning of the pruning process and performs re-optimization on the pruned model. The second strategy, Hard Filter Pruning (HFP), is based on Structured Pruning [5], which prunes the model several times until we reach the specified pruning ratio. Each pruning removes a portion of the 3D Gaussians that are considered less important by our importance score. The third strategy is based on Soft Filter Pruning (SFP) [3]. The method also performs multiple prunings but instead of directly bumping the redundant Gaussians, the method simply resets the Gaussians' feature coefficient to be 0. The model is not actually pruned until the last pruning. We test the three methods on 8 scenes from the Synthetic NeRF [6] dataset and set the pruning ratio to 0.6.

Ablation studies reveal that the three strategies show no obvious difference in terms of pruning performance. Although the SFP method is slightly better in most of the scene, we adopt the Single Pruning method for simplicity.

### B MORE EXPERIMENT RESULTS

To show the specific performance of our method, we provide our complete experimental results on each scene of the test dataset. Our method shows state of the art result in most of the scene. We color each cell as **best**, **second best** and **third best**.

**Table 4: Quantitative comparison of PSNR values on Shiny [7] dataset**

| Method   Scene  | Shiny | Lab   | Tools | Giants | Avg.  |
|-----------------|-------|-------|-------|--------|-------|
| 3D-GS           | 30.93 | 30.36 | 27.68 | 25.09  | 28.52 |
| Nex             | 31.43 | 30.43 | 28.16 | 26.00  | 29.01 |
| Scaffold-GS     | 33.35 | 32.17 | 28.06 | 25.18  | 29.69 |
| Ours            | 34.35 | 33.04 | 27.78 | 25.35  | 30.13 |
| Ours w/ pruning | 34.45 | 33.11 | 27.87 | 25.37  | 30.20 |

**Table 5: Quantitative comparison of SSIM values on Shiny [7] dataset**

| Method   Scene  | Shiny | Lab   | Tools | Giants | Avg.  |
|-----------------|-------|-------|-------|--------|-------|
| 3D-GS           | 0.939 | 0.927 | 0.921 | 0.866  | 0.913 |
| Nex             | 0.958 | 0.949 | 0.953 | 0.898  | 0.940 |
| Scaffold-GS     | 0.949 | 0.945 | 0.929 | 0.851  | 0.918 |
| Ours            | 0.954 | 0.952 | 0.924 | 0.868  | 0.925 |
| Ours w/ pruning | 0.954 | 0.952 | 0.925 | 0.859  | 0.923 |

**Table 6: Quantitative comparison of LPIPS values on Shiny [7] dataset**

| Method   Scene  | Shiny | Lab   | Tools | Giants | Avg.  |
|-----------------|-------|-------|-------|--------|-------|
| 3D-GS           | 0.118 | 0.139 | 0.153 | 0.103  | 0.128 |
| Nex             | 0.129 | 0.146 | 0.151 | 0.147  | 0.143 |
| Scaffold-GS     | 0.100 | 0.103 | 0.127 | 0.141  | 0.118 |
| Ours            | 0.098 | 0.110 | 0.148 | 0.105  | 0.115 |
| Ours w/ pruning | 0.103 | 0.116 | 0.149 | 0.116  | 0.121 |

**Table 7: Quantitative comparison of PSNR values on Mip-NeRF360 [1] dataset**

| Method   Scene  | Bicycle | Bonsai | Counter | Stump | Garden | Kitchen | Room  |
|-----------------|---------|--------|---------|-------|--------|---------|-------|
| Plenoxels       | 21.91   | 24.67  | 23.62   | 20.66 | 23.49  | 23.42   | 27.59 |
| iNGP            | 22.17   | 30.69  | 26.69   | 23.47 | 25.07  | 29.48   | 29.69 |
| Mip-NeRF        | 24.30   | 33.39  | 29.44   | 26.17 | 26.87  | 31.98   | 31.46 |
| 3DGS            | 25.09   | 32.32  | 29.07   | 26.65 | 27.27  | 31.54   | 31.66 |
| Scaffold-GS     | 25.05   | 32.49  | 29.44   | 26.49 | 27.33  | 31.59   | 32.13 |
| Ours            | 25.13   | 33.01  | 29.54   | 26.58 | 27.50  | 31.99   | 31.79 |
| Ours w/ pruning | 25.07   | 33.58  | 29.87   | 26.49 | 27.53  | 32.30   | 32.23 |

**Table 8: Quantitative comparison of SSIM values on Mip-NeRF360 [1] dataset**

| Method   Scene  | Bicycle | Bonsai | Counter | Stump | Garden | Kitchen | Room  |
|-----------------|---------|--------|---------|-------|--------|---------|-------|
| Plenoxels       | 0.496   | 0.814  | 0.759   | 0.523 | 0.606  | 0.648   | 0.842 |
| iNGP            | 0.512   | 0.906  | 0.817   | 0.594 | 0.701  | 0.858   | 0.871 |
| Mip-NeRF360     | 0.685   | 0.938  | 0.892   | 0.745 | 0.809  | 0.917   | 0.910 |
| 3DGS            | 0.746   | 0.946  | 0.913   | 0.768 | 0.855  | 0.931   | 0.925 |
| Scaffold-GS     | 0.738   | 0.946  | 0.914   | 0.754 | 0.846  | 0.929   | 0.927 |
| Ours            | 0.745   | 0.947  | 0.917   | 0.767 | 0.858  | 0.933   | 0.926 |
| Ours w/ pruning | 0.743   | 0.949  | 0.919   | 0.760 | 0.853  | 0.935   | 0.929 |

**Table 9: Quantitative comparison of LPIPS values on Mip-NeRF360 [1] dataset**

| Method   Scene  | Bicycle | Bonsai | Counter | Stump | Garden | Kitchen | Room  |
|-----------------|---------|--------|---------|-------|--------|---------|-------|
| Plenoxels       | 0.506   | 0.398  | 0.441   | 0.503 | 0.386  | 0.447   | 0.419 |
| iNGP            | 0.446   | 0.205  | 0.306   | 0.421 | 0.257  | 0.195   | 0.261 |
| Mip-NeRF        | 0.305   | 0.179  | 0.207   | 0.265 | 0.171  | 0.128   | 0.213 |
| 3DGS            | 0.244   | 0.180  | 0.183   | 0.243 | 0.122  | 0.116   | 0.197 |
| Scaffold-GS     | 0.266   | 0.186  | 0.195   | 0.276 | 0.143  | 0.121   | 0.200 |
| Ours            | 0.243   | 0.180  | 0.182   | 0.243 | 0.120  | 0.114   | 0.198 |
| Ours w/ pruning | 0.242   | 0.184  | 0.185   | 0.246 | 0.130  | 0.118   | 0.199 |

**Table 10: Quantitative comparison of metrics on Tanks & Temples [4] dataset**

| Dataset         | Truck |       |       | Train |       |       |
|-----------------|-------|-------|-------|-------|-------|-------|
| Method   Metric | PSNR  | SSIM  | LPIPS | PSNR  | SSIM  | LPIPS |
| Plenoxels       | 23.22 | 0.774 | 0.335 | 18.93 | 0.663 | 0.422 |
| iNGP            | 23.38 | 0.800 | 0.249 | 20.46 | 0.689 | 0.360 |
| Mip-NeRF360     | 24.91 | 0.857 | 0.159 | 19.52 | 0.660 | 0.354 |
| 3D-GS           | 25.15 | 0.864 | 0.194 | 21.99 | 0.809 | 0.241 |
| Scaffold-GS     | 25.77 | 0.883 | 0.147 | 22.15 | 0.822 | 0.206 |
| Ours            | 25.54 | 0.880 | 0.146 | 22.44 | 0.816 | 0.205 |
| Ours w/ pruning | 25.79 | 0.882 | 0.145 | 22.70 | 0.814 | 0.219 |

**Table 11: Quantitative comparison of PSNR values on Synthetic NeRF [6] dataset**

| Method   Scene  | Mic   | Chair | Ship  | Materials | Lego  | Drums | Ficus | Hotdog | Avg.  |
|-----------------|-------|-------|-------|-----------|-------|-------|-------|--------|-------|
| Mip-NeRF        | 36.51 | 35.14 | 30.41 | 30.71     | 35.70 | 25.48 | 33.29 | 37.48  | 33.09 |
| Tri-MipRF       | 37.75 | 36.10 | 28.78 | 30.73     | 36.15 | 26.59 | 34.51 | 38.54  | 33.64 |
| GS-Shader       | 35.23 | 35.83 | 30.82 | 30.07     | 35.87 | 26.36 | 34.97 | 37.85  | 33.38 |
| 3DGS            | 36.67 | 35.52 | 31.67 | 30.49     | 36.08 | 26.28 | 35.49 | 38.10  | 33.79 |
| Scaffold-GS     | 37.25 | 35.28 | 31.17 | 30.65     | 35.69 | 26.44 | 35.21 | 37.73  | 33.68 |
| Ours            | 36.90 | 35.68 | 31.81 | 30.65     | 36.40 | 26.68 | 35.66 | 38.08  | 33.98 |
| Ours w/ pruning | 37.04 | 36.09 | 31.56 | 30.35     | 36.50 | 26.59 | 35.61 | 38.13  | 33.98 |

**Table 12: Quantitative comparison of SSIM values on Synthetic NeRF [6] dataset**

| Method   Scene  | Mic   | Chair | Ship  | Materials | Lego  | Drums | Ficus | Hotdog | Avg.  |
|-----------------|-------|-------|-------|-----------|-------|-------|-------|--------|-------|
| Mip-NeRF        | 0.991 | 0.981 | 0.882 | 0.959     | 0.978 | 0.932 | 0.980 | 0.982  | 0.961 |
| Tri-MipRF       | 0.992 | 0.985 | 0.879 | 0.953     | 0.982 | 0.939 | 0.983 | 0.984  | 0.962 |
| GS-Shader       | 0.991 | 0.987 | 0.905 | 0.960     | 0.983 | 0.949 | 0.985 | 0.985  | 0.968 |
| 3DGS            | 0.993 | 0.988 | 0.906 | 0.960     | 0.983 | 0.950 | 0.987 | 0.985  | 0.970 |
| Scaffold-GS     | 0.992 | 0.985 | 0.898 | 0.960     | 0.980 | 0.950 | 0.985 | 0.983  | 0.967 |
| Ours            | 0.993 | 0.988 | 0.907 | 0.961     | 0.983 | 0.955 | 0.987 | 0.985  | 0.970 |
| Ours w/ pruning | 0.993 | 0.988 | 0.905 | 0.959     | 0.982 | 0.953 | 0.987 | 0.985  | 0.969 |

**Table 13: Quantitative comparison of LPIPS values on Synthetic NeRF [6] dataset**

| Method   Scene  | Mic   | Chair | Ship  | Materials | Lego  | Drums | Ficus | Hotdog | Avg.  |
|-----------------|-------|-------|-------|-----------|-------|-------|-------|--------|-------|
| Mip-NeRF        | 0.009 | 0.021 | 0.138 | 0.040     | 0.021 | 0.065 | 0.020 | 0.027  | 0.043 |
| Tri-MipRF       | 0.008 | 0.016 | 0.136 | 0.052     | 0.016 | 0.066 | 0.020 | 0.021  | 0.042 |
| GS-Shader       | 0.006 | 0.012 | 0.098 | 0.033     | 0.014 | 0.040 | 0.013 | 0.019  | 0.029 |
| 3DGS            | 0.006 | 0.010 | 0.106 | 0.037     | 0.016 | 0.037 | 0.012 | 0.020  | 0.031 |
| Scaffold-GS     | 0.008 | 0.013 | 0.114 | 0.040     | 0.019 | 0.042 | 0.013 | 0.023  | 0.034 |
| Ours            | 0.006 | 0.010 | 0.108 | 0.037     | 0.016 | 0.035 | 0.012 | 0.020  | 0.030 |
| Ours w/ pruning | 0.006 | 0.010 | 0.113 | 0.039     | 0.018 | 0.037 | 0.012 | 0.021  | 0.032 |

**Table 14: Quantitative comparison of PSNR on Spaces [2] dataset**

| Method   Scene  | Scene 0 | Scene 10 | Scene 23 | Scene 24 | Scene 56 | Scene 62 | Scene 63 | Scene 73 | Avg.  |
|-----------------|---------|----------|----------|----------|----------|----------|----------|----------|-------|
| 3D-GS           | 30.69   | 27.98    | 26.01    | 43.98    | 29.91    | 32.17    | 32.07    | 30.77    | 31.70 |
| Nex             | 37.61   | 37.61    | 35.69    | 37.77    | 34.77    | 35.34    | 35.44    | 34.81    | 36.13 |
| Scaffold-GS     | 34.35   | 40.23    | 34.80    | 41.51    | 34.53    | 39.48    | 37.66    | 36.70    | 37.41 |
| Ours            | 34.61   | 42.42    | 39.09    | 43.57    | 34.28    | 41.33    | 38.64    | 37.58    | 38.94 |
| Ours w/ pruning | 37.05   | 43.10    | 41.63    | 46.33    | 35.43    | 42.39    | 40.30    | 38.82    | 40.63 |

**Table 15: Quantitative comparison of SSIM on Spaces [2] dataset**

| Method   Scene  | Scene 0 | Scene 10 | Scene 23 | Scene 24 | Scene 56 | Scene 62 | Scene 63 | Scene 73 | Avg.  |
|-----------------|---------|----------|----------|----------|----------|----------|----------|----------|-------|
| 3D-GS           | 0.908   | 0.900    | 0.864    | 0.988    | 0.922    | 0.930    | 0.968    | 0.892    | 0.922 |
| Nex             | 0.989   | 0.989    | 0.986    | 0.989    | 0.981    | 0.984    | 0.987    | 0.986    | 0.986 |
| Scaffold-GS     | 0.959   | 0.981    | 0.969    | 0.987    | 0.959    | 0.979    | 0.980    | 0.977    | 0.974 |
| Ours            | 0.962   | 0.982    | 0.977    | 0.989    | 0.954    | 0.979    | 0.981    | 0.979    | 0.975 |
| Ours w/ pruning | 0.974   | 0.984    | 0.982    | 0.991    | 0.961    | 0.980    | 0.984    | 0.981    | 0.980 |

**Table 16: Quantitative comparison of LPIPS on Spaces [2] dataset**

| Method   Scene  | Scene 0 | Scene 10 | Scene 23 | Scene 24 | Scene 56 | Scene 62 | Scene 63 | Scene 73 | Avg.  |
|-----------------|---------|----------|----------|----------|----------|----------|----------|----------|-------|
| 3D-GS           | 0.203   | 0.203    | 0.270    | 0.025    | 0.137    | 0.202    | 0.060    | 0.116    | 0.152 |
| Nex             | 0.049   | 0.095    | 0.098    | 0.090    | 0.087    | 0.121    | 0.073    | 0.065    | 0.085 |
| Scaffold-GS     | 0.055   | 0.031    | 0.058    | 0.027    | 0.072    | 0.061    | 0.031    | 0.035    | 0.046 |
| Ours            | 0.059   | 0.039    | 0.066    | 0.026    | 0.083    | 0.076    | 0.038    | 0.038    | 0.053 |
| Ours w/ pruning | 0.046   | 0.042    | 0.061    | 0.027    | 0.079    | 0.080    | 0.037    | 0.036    | 0.051 |

**Table 17: Quantitative comparison of FPS and Memory usage on Spaces [2] dataset**

| Dataset         | Scene 0 |       | Scene 10 |      | Scene 23 |      | Scene 24 |      | Scene 56 |       | Scene 62 |      | Scene 63 |       | Scene 73 |       | Avg. |      |
|-----------------|---------|-------|----------|------|----------|------|----------|------|----------|-------|----------|------|----------|-------|----------|-------|------|------|
| Method   Metric | FPS↑    | Mem↓  | FPS↑     | Mem↓ | FPS↑     | Mem↓ | FPS↑     | Mem↓ | FPS↑     | Mem↓  | FPS↑     | Mem↓ | FPS↑     | Mem↓  | FPS↑     | Mem↓  | FPS↑ | Mem↓ |
| 3D-GS           | 490     | 84MB  | 542      | 70MB | 442      | 75MB | 493      | 66MB | 481      | 104MB | 614      | 37MB | 426      | 124MB | 468      | 125MB | 495  | 86MB |
| Scaffold-GS     | 102     | 85MB  | 144      | 54MB | 120      | 63MB | 179      | 43MB | 146      | 108MB | 120      | 62MB | 91       | 95MB  | 107      | 101MB | 126  | 76MB |
| Ours            | 314     | 122MB | 465      | 42MB | 306      | 72MB | 537      | 51MB | 414      | 122MB | 504      | 44MB | 400      | 77MB  | 427      | 83MB  | 421  | 77MB |
| Ours w/ pruning | 484     | 50MB  | 592      | 18MB | 514      | 30MB | 699      | 22MB | 497      | 50MB  | 599      | 19MB | 508      | 32MB  | 513      | 34MB  | 551  | 32MB |

**Table 18: Quantitative comparison of FPS and Memory usage on Shiny [7] dataset**

| Dataset         | Shiny |       | Lab  |       | Tools |       | Giants |       | Avg.  |       |
|-----------------|-------|-------|------|-------|-------|-------|--------|-------|-------|-------|
| Method   Metric | FPS↑  | MEM↓  | FPS↑ | MEM↓  | FPS↑  | MEM↓  | FPS↑   | MEM↓  | FPS↑  | MEM↓  |
| 3D-GS           | 239   | 159MB | 256  | 133MB | 234   | 310MB | 156    | 680MB | 221   | 321MB |
| Scaffold-GS     | 97    | 120MB | 66   | 184MB | 51    | 284MB | 52     | 308MB | 66.47 | 224MB |
| Ours            | 294   | 114MB | 208  | 101MB | 229   | 300MB | 167    | 547MB | 225   | 266MB |
| Ours w/ pruning | 345   | 47MB  | 481  | 42MB  | 337   | 113MB | 250    | 220MB | 353   | 105MB |

Conference on Computer Vision (ICCV). IEEE Computer Society, Los Alamitos, CA, USA, 2755–2763. <https://doi.org/10.1109/ICCV.2017.298>

- [6] Ben Mildenhall, Pratul P. Srinivasan, Matthew Tancik, Jonathan T. Barron, Ravi Ramamoorthi, and Ren Ng. 2021. NeRF: representing scenes as neural radiance fields for view synthesis. *Commun. ACM* 65, 1 (dec 2021), 99–106. <https://doi.org/10.1145/3503250>
- [7] Suttisak Wizadwongsa, Pakkapon Phongthawee, Jiraphon Yenphraphai, and Supasorn Suwajanakorn. 2021. NeX: Real-time View Synthesis with Neural Basis Expansion. In *IEEE Conference on Computer Vision and Pattern Recognition (CVPR)*.

## REFERENCES

- [1] Jonathan T. Barron, Ben Mildenhall, Dor Verbin, Pratul P. Srinivasan, and Peter Hedman. 2022. Mip-NeRF 360: Unbounded Anti-Aliased Neural Radiance Fields. *CVPR* (2022).
- [2] John Flynn, Michael Broxton, Paul Debevec, Matthew DuVall, Graham Fyffe, Ryan Overbeck, Noah Snavely, and Richard Tucker. 2019. Deepview: View synthesis with learned gradient descent. In *Proceedings of the IEEE/CVF Conference on Computer Vision and Pattern Recognition*. 2367–2376.
- [3] Yihui He, Xiangyu Zhang, and Jian Sun. 2017. Channel Pruning for Accelerating Very Deep Neural Networks. In *2017 IEEE International Conference on Computer Vision (ICCV)*. 1398–1406. <https://doi.org/10.1109/ICCV.2017.155>
- [4] Arno Knapitsch, Jaesik Park, Qian-Yi Zhou, and Vladlen Koltun. 2017. Tanks and temples: Benchmarking large-scale scene reconstruction. *ACM Transactions on Graphics (ToG)* 36, 4 (2017), 1–13.
- [5] Z. Liu, J. Li, Z. Shen, G. Huang, S. Yan, and C. Zhang. 2017. Learning Efficient Convolutional Networks through Network Slimming. In *2017 IEEE International*
